# Supplementary material for: Magnetic Hydroxyapatite Composite Nanoparticles for Augmented Differentiation of MC3T3-E1 Cells for Bone Tissue Engineering
Source: MDPI journal article supplement (doi:10.3390/md21020085), 2023-01-25
Supplement: s1 [file s1]

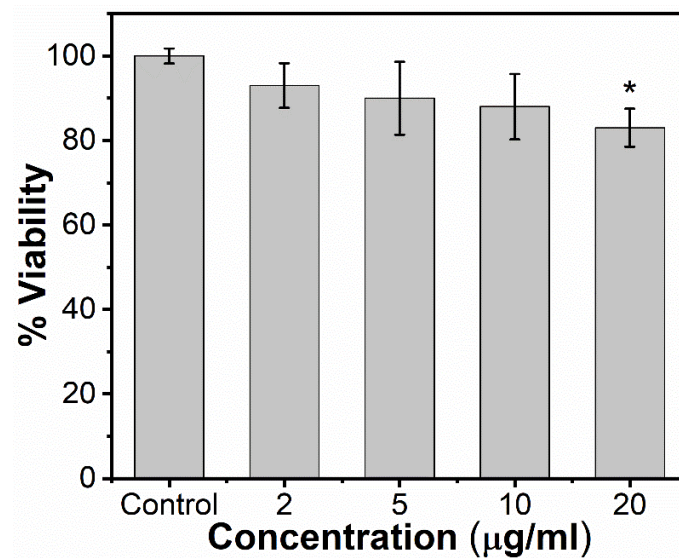

**Figure S1.** MTT assay showing % of MC3T3-E1 cell viability treated with varying concentrations (0-20 µg/ml) of MHAP NPs for 24 h, respectively. Data were presented as mean  $\pm$  standard deviation (n=4) and significance print (\*p < 0.05).
